# Supplementary material for: Copper or/and arsenic induce oxidative stress-cascaded, nuclear factor kappa B-dependent inflammation and immune imbalance, trigging heat shock response in the kidney of chicken
Source: PubMed Central journal article supplement (PMC5716717; doi:10.18632/oncotarget.21463), 2017-10-03
Supplement: oncotarget-08-98103-s001.pdf [file oncotarget-08-98103-s001.pdf]

## Copper or/and arsenic induce oxidative stress-cascaded, nuclear factor kappa B-dependent inflammation and immune imbalance, triggering heat shock response in the kidney of chicken

### SUPPLEMENTARY MATERIALS

**Supplementary Table 1: Standard error of the mean of the heat map in Figure 5B**

|               | 4 Wk |          |          |          | 8 Wk |          |          |          | 12 Wk |          |          |          |
|---------------|------|----------|----------|----------|------|----------|----------|----------|-------|----------|----------|----------|
|               | C    | Cu       | As       | Cu+As    | C    | Cu       | As       | Cu+As    | C     | Cu       | As       | Cu+As    |
| IL-1 $\beta$  | 0    | 0.136854 | 0.158085 | 0.167459 | 0    | 0.157224 | 0.148628 | 0.149890 | 0     | 0.193567 | 0.184654 | 0.195547 |
| IL-2          | 0    | 0.127024 | 0.084624 | 0.175932 | 0    | 0.128435 | 0.118575 | 0.104847 | 0     | 0.111564 | 0.124568 | 0.119739 |
| IL-6          | 0    | 0.153856 | 0.18563  | 0.298304 | 0    | 0.168872 | 0.178348 | 0.135839 | 0     | 0.164758 | 0.215367 | 0.224264 |
| IL-8          | 0    | 0.294725 | 0.285624 | 0.337656 | 0    | 0.236286 | 0.258375 | 0.337656 | 0     | 0.244595 | 0.307532 | 0.307637 |
| IL-12 $\beta$ | 0    | 0.084702 | 0.109890 | 0.119982 | 0    | 0.077674 | 0.098743 | 0.113767 | 0     | 0.105767 | 0.115463 | 0.109756 |
| IL-17         | 0    | 0.09342  | 0.112887 | 0.117453 | 0    | 0.136936 | 0.127908 | 0.135804 | 0     | 0.09     | 0.111668 | 0.104794 |
| IFN- $\gamma$ | 0    | 0.073390 | 0.097892 | 0.072649 | 0    | 0.084342 | 0.098785 | 0.089764 | 0     | 0.097690 | 0.060542 | 0.195685 |
| IL-4          | 0    | 0.103759 | 0.082645 | 0.109892 | 0    | 0.075645 | 0.083957 | 0.068593 | 0     | 0.074367 | 0.088448 | 0.085673 |
| IL-10         | 0    | 0.115924 | 0.098792 | 0.087860 | 0    | 0.078630 | 0.084856 | 0.069758 | 0     | 0.075645 | 0.064563 | 0.065846 |

**Supplementary Table 2: Pearson's r correlation coefficient matrix among indicators measured in the chicken kidney \* $P < 0.05$ ; # $P < 0.01$ . See\_Supplementary\_Table 2**
